# Supplementary material for: Zeaxanthin ameliorates obesity by activating the β3-adrenergic receptor to stimulate inguinal fat thermogenesis and modulating the gut microbiota
Source: Royal Society of Chemistry journal article supplement (doi:10.1039/d1fo02863d), 2021-01-01
Supplement: d1fo02863d1.pdf [file d1fo02863d1.pdf]

## Supplementary files

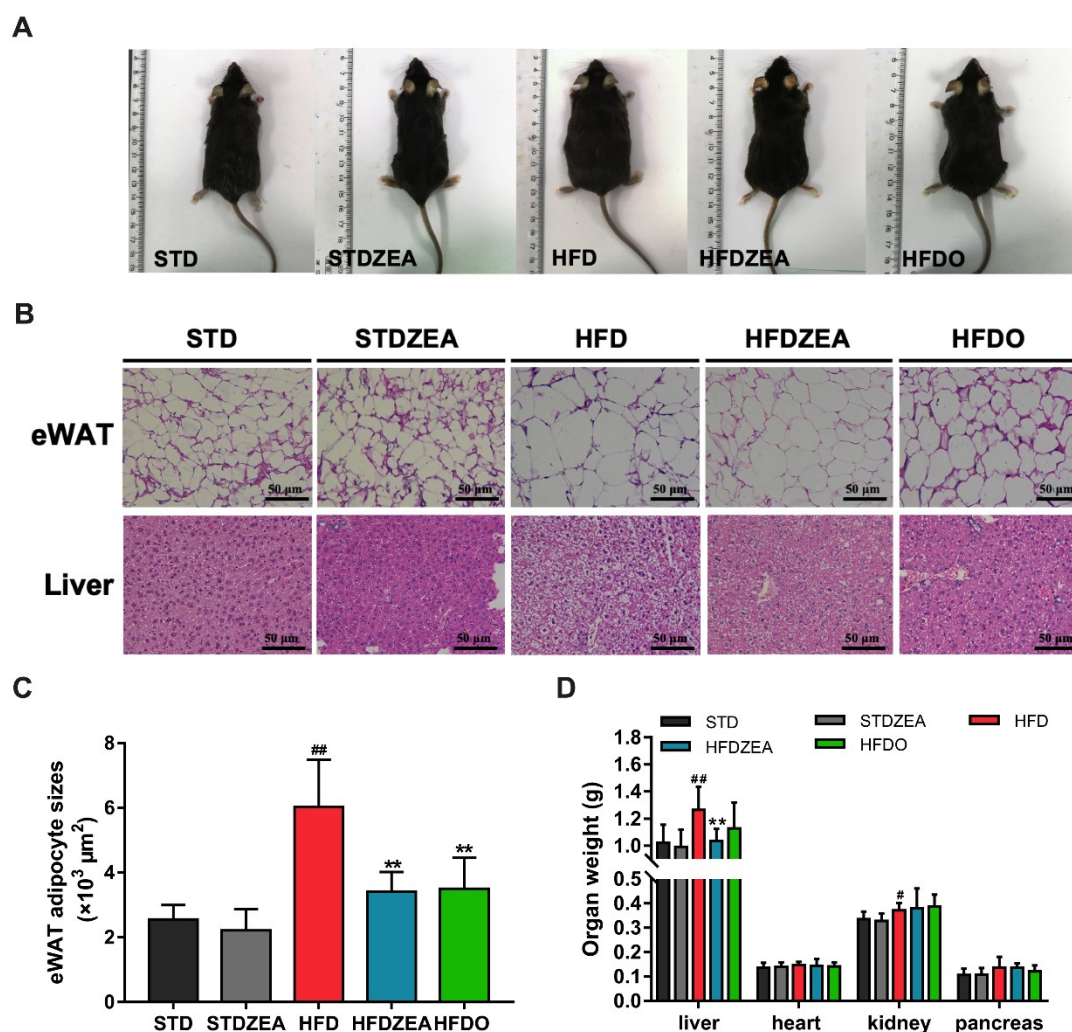

**Fig. S1 ZEA improves eWAT adipocyte hypertrophy, reduces liver weight and lipid deposition in HFD-fed mice.** (A) Whole-body image of mice in different groups. (B) H&E staining of eWAT and liver (scale bar, 50  $\mu\text{m}$ ). (C) EWAT adipocyte sizes. (D) Organ weight of liver, heart, kidney, and pancreas ( $n = 12$ ). <sup>#</sup> $P < 0.05$ , <sup>##</sup> $P < 0.01$  STDZEA, HFD vs. STD; <sup>\*\*</sup> $P < 0.01$  HFDZEA, HFDO vs. HFD.

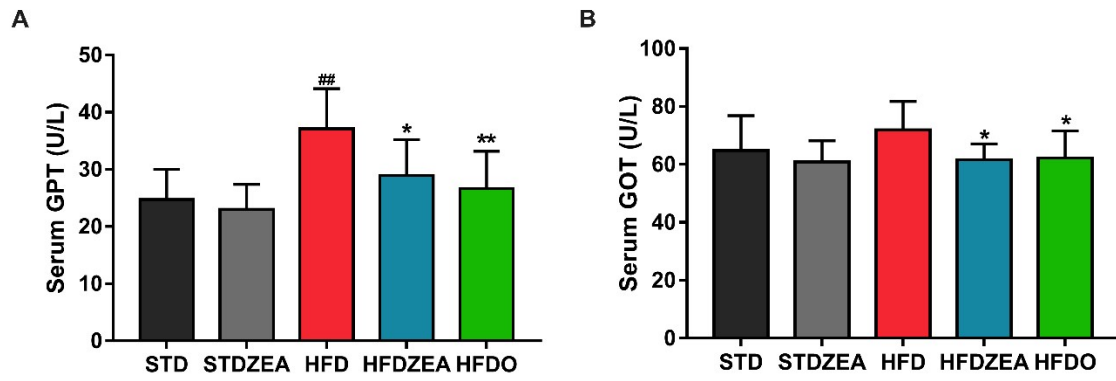

**Fig. S2 ZEA improves serum GPT and GOT in HFD-fed mice.** (A) Serum GPT. (B) Serum GOT. (n = 8). <sup>##</sup>*P* < 0.01 STDZEA, HFD vs. STD; <sup>\*</sup>*P* < 0.05, <sup>\*\*</sup>*P* < 0.01 HFDZEA, HFDO vs. HFD.

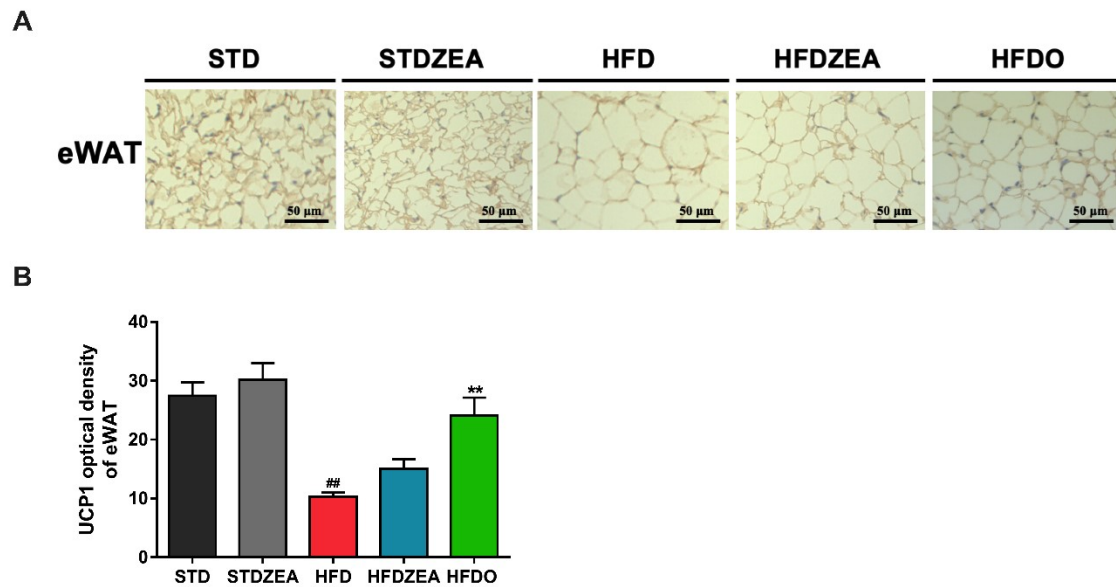

**Fig. S3 ZEA can not induce UCP1 expression in eWAT.** (A) Immunohistochemical staining with UCP1 antibody performed on eWAT (scale bar = 50 μm). (B) UCP1 optical density of eWAT. <sup>##</sup>*P* < 0.01 STDZEA, HFD vs. STD; <sup>\*\*</sup>*P* < 0.01 HFDZEA, HFDO vs. HFD.

**A****iWAT**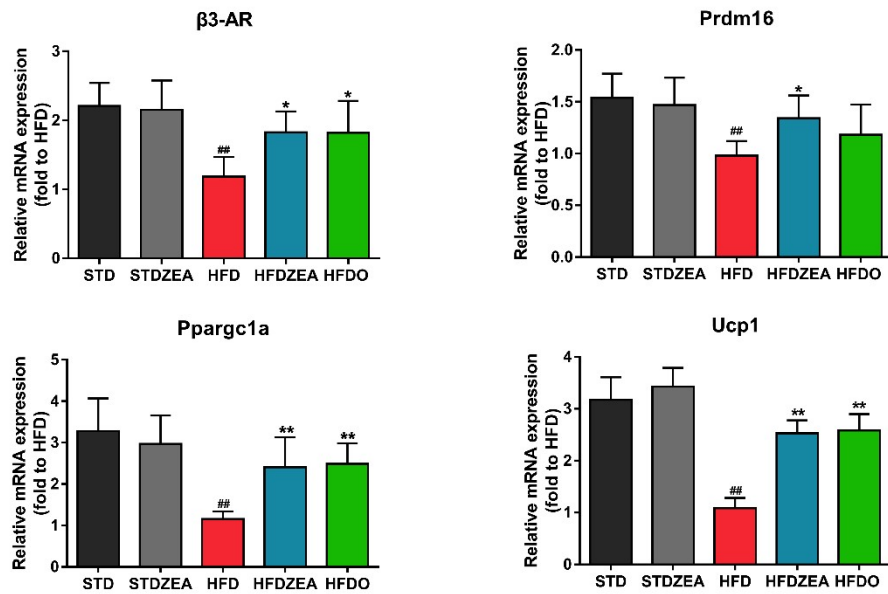**B****BAT**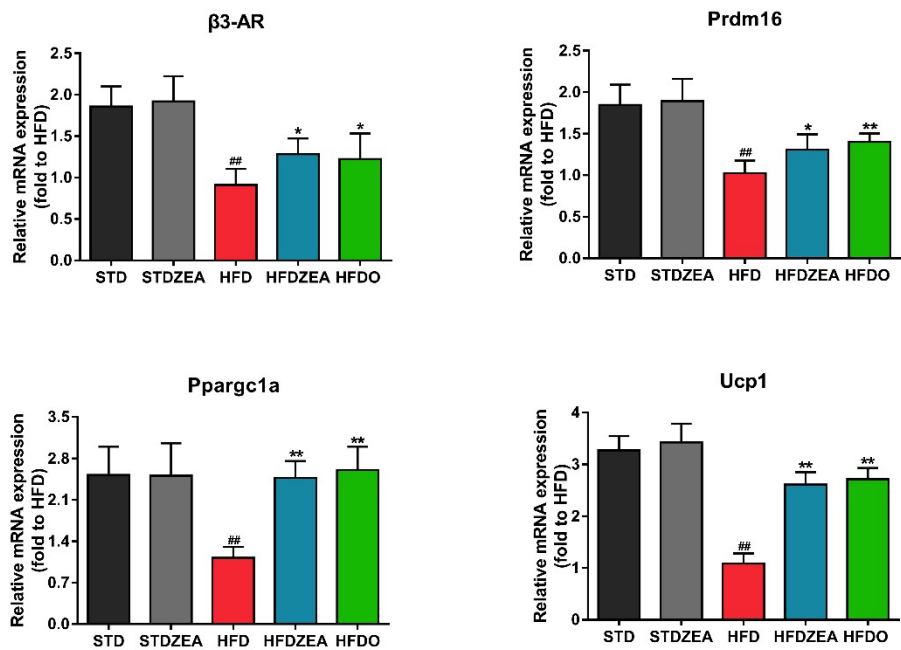

**Fig. S4 ZEA induces the expression of  $\beta 3$ -ar and key thermogenic genes in iWAT and BAT.**

The mRNA expression of  $\beta 3$ -ar, Prdm16, Pgc-1a, Ucp1 in iWAT (A) and BAT (B). (n = 6). ##P <

0.01 STDZEA, HFD vs. STD; \*P < 0.05, \*\*P < 0.01 HFDZEA, HFDO vs. HFD.

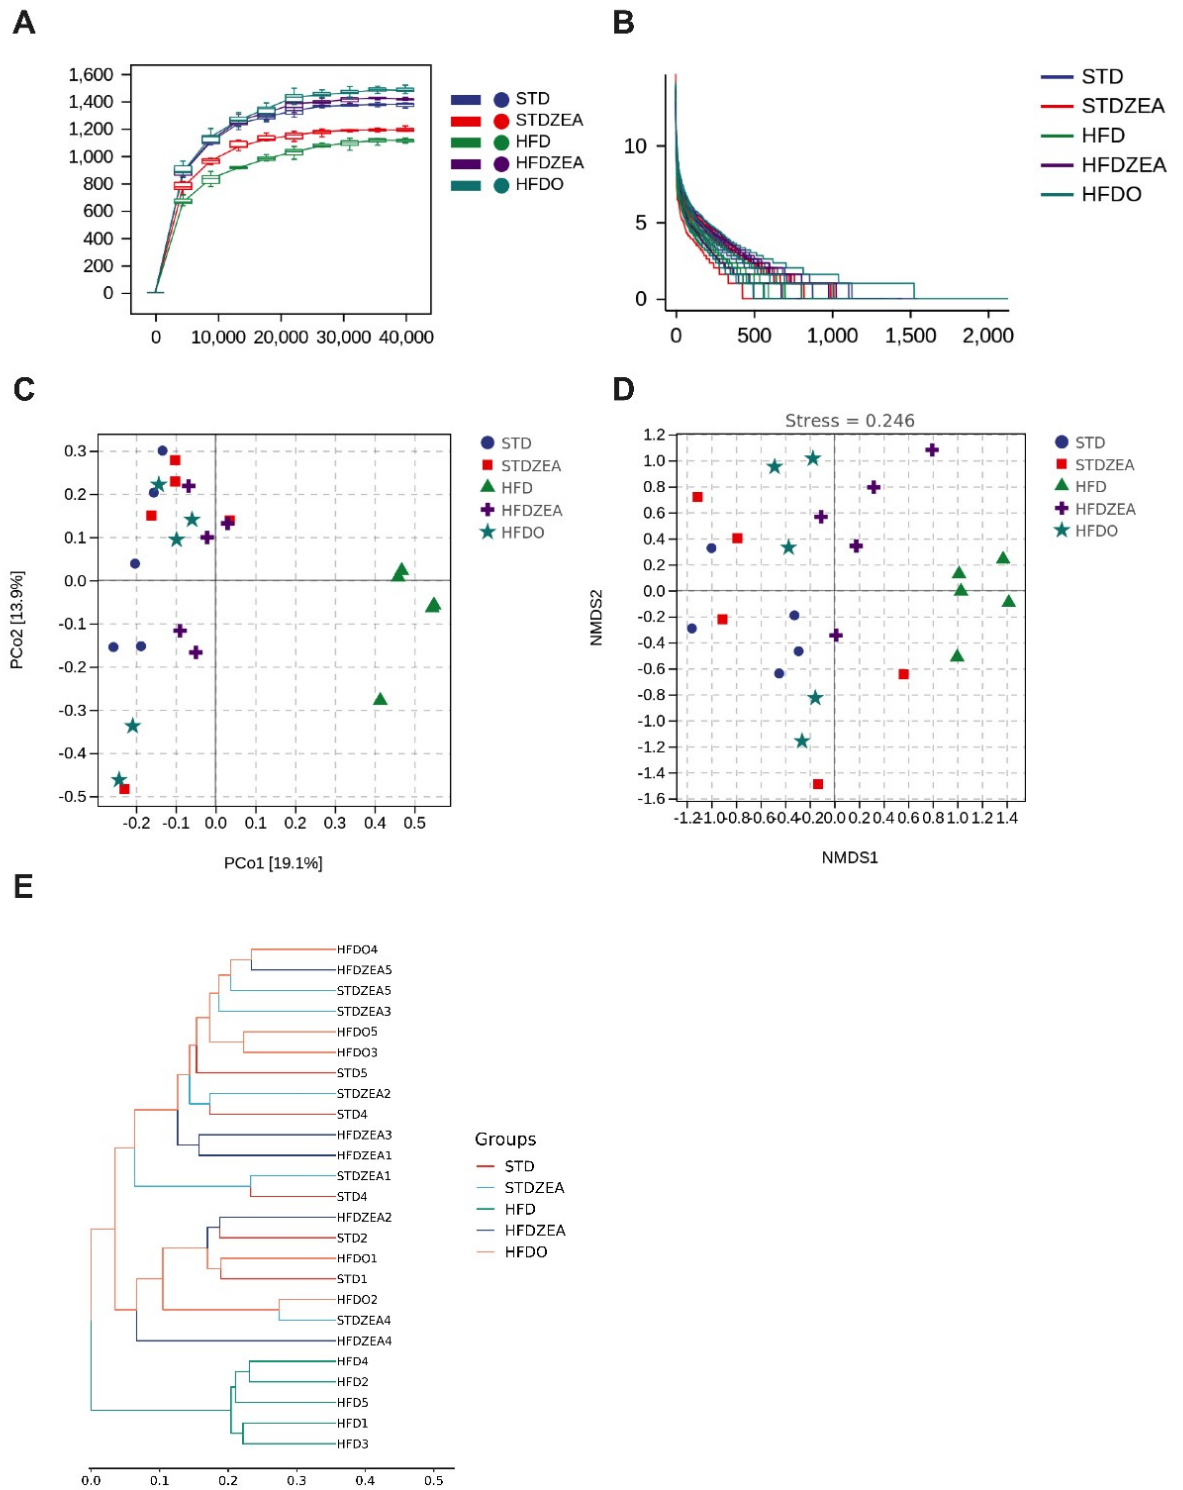

**Fig. S5 ZEA reverses the microbial structure destroyed by HFD.** (A) Rarefaction curves. (B)

Rank abundance curves. (C) PCoA plot. (D) NMDS plot. (E) UPGMA analysis. (n = 5).

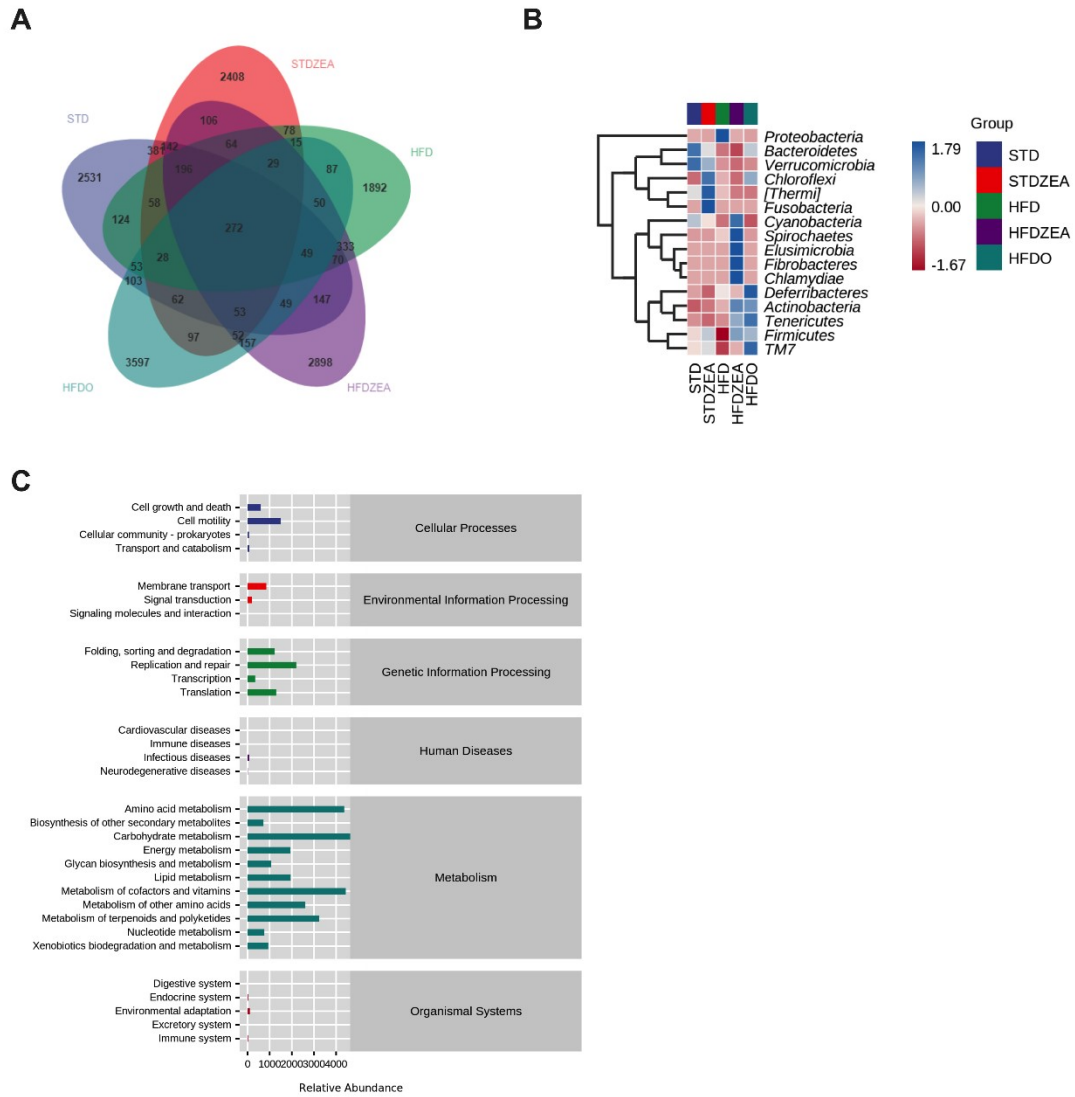

**Fig. S6 ZEA improves gut microbiota dysbiosis and enriches lipid metabolism-related KEGG pathways.** (A) OTU-Venn analysis. (B) The heat map clustering analysis at the level of bacterial phylum level. (C) Analysis of KEGG enrichment pathways between HFDZEA and HFD groups at level 2. (n = 5).

**Table S1 Composition and ingredients of different diets**

| STD (D12450B) | HFD (D12492) |
|---------------|--------------|
|---------------|--------------|

| Composition                           | gm%  | kcal% | gm%  | kcal% |
|---------------------------------------|------|-------|------|-------|
| Protein                               | 19   | 20    | 26   | 20    |
| Carbohydrate                          | 67   | 70    | 26   | 20    |
| Fat                                   | 4    | 10    | 35   | 60    |
| Total                                 | -    | 100   | -    | 100   |
| kcal/gm                               |      | 3.8   |      | 5.2   |
| Ingredient                            | gm   | kcal  | gm   | kcal  |
| Casein, 80 Mesh                       | 200  | 800   | 200  | 800   |
| L-Cystine                             | 3    | 12    | 3    | 12    |
| Corn Starch                           | 315  | 1260  | -    | -     |
| Maltodextrin 10                       | 35   | 140   | 125  | 500   |
| Sucrose                               | 350  | 1400  | 68.8 | 272   |
| Cellulose, BW200                      | 50   | -     | 50   | -     |
| Soybean Oil                           | 25   | 225   | 25   | 225   |
| Lard                                  | 20   | 180   | 245  | 2205  |
| Mineral Mix S10026                    | 10   | -     | 10   | -     |
| DiCalcium Phosphate                   | 13   | -     | 13   | -     |
| Calcium Carbonate                     | 5.5  | -     | 5.5  | -     |
| Potassium Citrate, 1 H <sub>2</sub> O | 16.5 | -     | 16.5 | -     |
| Vitamin Mix V10001                    | 10   | 40    | 10   | 40    |
| Choline Bitartrate                    | 2    | -     | 2    | -     |
| FD&C Yellow Dye #5                    | 0.05 | -     | -    | -     |

|                  |         |      |        |      |
|------------------|---------|------|--------|------|
| FD&C Blue Dye #1 | -       | -    | 0.05   | -    |
| Total            | 1055.05 | 4057 | 773.85 | 4057 |

**Table S2 Primer sequences used for the Real-time qPCR**

| <b>Primer name</b> | <b>Forward (5'-3')</b> | <b>Reverse (5'-3')</b>   |
|--------------------|------------------------|--------------------------|
| $\beta$ 3-AR       | TGATGGCTATGAAGGTGCG    | AAAATCCCCAGAAGTCCTGC     |
| Prdm16             | CAGTGGGGAGAGAGGACAGA   | ACGGATGTACTIONTGGAGCCAGC |
| Pgc-1 $\alpha$     | CACCAAACCCACAGAAAACAG  | GGGTCAGAGGAAGAGATAAAGTTG |
| Ucp1               | GCATTCAGAGGCAAATCAGC   | GCCACACCTCCAGTCATTAAG    |
| Nrf1               | GCTAATGGCCTGGTCCAGAT   | CTGCGCTGTCCGATATCCTG     |
| Tfam               | CACCCAGATGCAAACTTTCAG  | CTGCTCTTTATACTTGCTCACAG  |
| Nampt              | GAATGTCTCCTTCGGTTCTGG  | TCAGCAACTGGGTCCTTAAAC    |
| Cyt-C              | AAGGGAGGCAAGCATAAGAC   | ATTCTCCAAATACTCCATCAGGG  |
| Sirt1              | CTCTGAAAGTGAGACCAGTAGC | TGTAGATGAGGCAAAGGTTCC    |
| Pex3               | AGTTTGCAGTGAGACACCTAG  | AGTCCGCTGTAGTTTTCTGG     |
| Pex16              | CCGTTCTATGACCGCTTCTC   | GGAGGGCAAGTAGTCCATGA     |
| Pex19              | AGCATCATGCAGAACCTCCT   | TGCTGCTGCTGGTACTTCTC     |
| Pmp 70             | TCTGCCTACTCCATAAGCGG   | CACCACAGCTCGCTCTTTCT     |
| Cpt1               | ACCACTGGCCGCATGT       | CTCCATGGCGTAGTAGTTGCT    |
| Cpt2               | CAGCACAGCATCGTACCCA    | TCCCAATGCCGTTCTCAAAT     |
| Acadm              | AGGGTTTAGTTTTGAGTTGACG | CCCCGCTTTTGTTCATATTCCG   |

|                |                           |                     |
|----------------|---------------------------|---------------------|
| Acox1          | CAAGACCCAAGAGTTCATT       | TTCAGGTAGCCATTATCCA |
| $\beta$ -actin | CATCCGTAAAGACCTCTATGCCAAC | ATGGAGCCACCGATCCACA |

---

**Table S3 List of Antibodies**

| <b>Antibodies</b>    | <b>Source</b>             | <b>Catalogue #</b> |
|----------------------|---------------------------|--------------------|
| $\beta$ 3-AR         | Abcam                     | ab94506            |
| PRDM16               | Abclonal                  | A18633             |
| PGC-1 $\alpha$       | Proteintech Group Inc     | #20658             |
| UCP1                 | Abcam                     | ab10983            |
| ATGL                 | Cell Signaling Technology | #2439              |
| CGI-58               | Santa Cruz Biotechnology  | sc100468           |
| phospho (Ser563)-HSL | Cell Signaling Technology | #4139              |
| HSL                  | Cell Signaling Technology | #4107              |
| SIRT1                | Cell Signaling Technology | #2496              |
| PMP70                | Abcam                     | ab3421             |

---
